# Supplementary material for: Solvent–solute interactions in ionic liquids
Source: Royal Society of Chemistry journal article supplement (doi:10.1039/b303095d), 2003-01-01
Supplement: experimental.doc [file experimental.doc]

**General**

Unless otherwise stated all reactions were conducted in an anaerobic atmosphere of nitrogen. Solvents were distilled from the relevant drying agents prior to use. Toluene was stood over Na and distilled (benzophenone used as a moisture indicator). Ethylacetate and dichloromethane were distilled from CaH2. 1-methylimidazole and 1,2-dimethylimidazole were distilled from KOH. 1-chlorobutane and 1-iodobutane were washed with concentrated H2SO4 then distilled from P2O5. Chloride content of the ionic liquids was determined by a AgNO3 test. AgCl has a solubility of 1.4 mgl-1 in water, hence all of the ionic liquids synthesised have chloride contents below this value.

**1-Butyl-3-methylimidazolium Chloride, [bmim]Cl**

To a vigorously stirred solution of 1-methylimidazole (1.25 mol) in toluene (125 cm3) at 0oC was added 1-chlorobutane (144 cm3, 1.38 mol). The solution was heated to reflux at *ca*. 110oC for 24 hours, after which it was placed in a freezer at *ca*. –20oC for 12 hours. The toluene was decanted and the remaining viscous oil/semi-solid re-crystallized from acetonitrile and then repeated re-crystallized from ethylacetate to yield a white crystalline solid, which was dried *in vacuo* to give [bmim]Cl in approximately 86 % yield. C8H15ClN2 requires: C, 54.31; H, 9.62; N, 15.84 %; Found: C, 54.23; H, 8.96; N, 16.12 %. 1H-NMR(270 MHz, Chloroform-*d*) : 10.54 (1H, s, NCHN), 7.55 (1H, m, CH3NCHCHN), 7.40 (1H, m, CH3NCHCHN), 4.26 (2H, t, J=7.3 Hz, NCH2(CH2)2CH3), 4.11 (3H, s, NCH3), 1.82 (2H, m, NCH2CH2CH2CH3), 1.30 (2H, m, N(CH2)2CH2CH3), 0.89 (3H, t, J=7.3 Hz, N(CH2)3CH3). Mass spectrum(FAB +ve) m/z:313 ({[bmim]2Cl}-), 139 ([bmim]+).

**1-Butyl-2,3-dimethylimidazolium Chloride, [bm2im]Cl**

To a vigorously stirred solution of 1,2-dimethylimidazole (1.25 mol) in toluene (125 cm3) at 0oC was added 1-chlorobutane (144 cm3, 1.38 mol). The solution was heated to reflux at *ca*. 110oC for 24 hours, after which it was placed in a freezer at *ca*. –20oC for 12 hours. The toluene was decanted and the remaining viscous oil/semi-solid re-crystallized from acetonitrile and then repeatedly re-crystallized from ethylacetate to yield a white crystalline solid, which was dried *in vacuo* to give [bm2im]Cl in 90 % yield. C9H19ClN2 requires: C, 56.68; H, 10.04; N, 14.69 %; Found: C, 56.74; H, 10.17; N, 14.76 %. 1H-NMR (270 MHz, Chloroform-*d*) : 7.77 (1H, d, J=1.98 Hz, CH3NCHCHN), 7.49 (1H, d, J=1.98 Hz, CH3NCHCHN), 4.16 (2H, t, J=7.42 Hz, NCH2(CH2)2CH3), 3.98 (3H, s, NCH3), 2.75 (3H, s, NC(CH3)N), 1.74 (2H, m, NCH2CH2CH2CH3), 1.31 (2H, m, N(CH2)2CH2CH3), 0.88 (3H, t, J=7.30 Hz, N(CH2)3CH3,). Mass spectrum(FAB +ve) m/z:341 ({[bm2im]2Cl}+), 153 ([bm2im]+); (FAB –ve) 223 ({[bm2im]Cl2}-), 35 ([Cl]-).

**1-Butyl-1-methylpyrrolidinium chloride, [bmpy]Cl.**

In a Schlenk flask, 1-chlorobutane (221cm3, 2.05mol) was added slowly with cooling to 1-methylpyrrolidine (200cm3, 1.92mol) in propan-2-ol (200cm3). The mixture was then brought to reflux for 24 hours. After cooling, the solvent was decanted to leave transparent crystals, which were re-crystallized with propan-2-ol, washed with ethyl acetate and then dried under vacuum, giving colourless crystals of [bmpy]Cl (314 g, 1.76 mol, 92%). 1H-NMR (270 MHz, Chloroform-*d*) H (ppm): 3.49-3.42 (m, 4H), 3.42-3.34 (m, 2H), 3.02 (s, 3H), 2.06 (br. s, 4H), 1.66 (quintet, 2H, *J* = 7.8 Hz), 1.29 (sextet, 2H, *J* = 7.8 Hz), 0.91 (3, t, 3H, *J* = 7.8 Hz). Mass spectrum (FAB+ve) *m*/*z*: 319 ([(bmpy)2Cl]+), 142 ([bmpy]+). Mass spectrum (FAB-ve) *m*/*z*: 212 ({[bmpy]Cl2}-, 100 %), 35 (Cl-).

**1-Butyl-3-methylimidazolium and 1-butyl-2,3-dimethylimidazolium ionic liquids**

[Anion] = PF6, BF4, CF3SO3, (CF3SO2)2N, SbF6

The respective metal salt (0.32 mol), required to give the desired ionic liquid, was added to a solution of either [BMIM]Cl or [BMMIM]Cl (0.29 mol) in dichloromethane and stirred for 24 hours. The suspension was filtered to remove the precipitated chloride salt and the organic phase repeatedly washed with small volumes of water (*ca.* 30 cm3) until no precipitation of AgCl occurred in the aqueous phase on addition of a concentrated AgNO3 solution. The organic phase was then washed a further two times with water to ensure complete removal of the chloride salt. The solvent was removed *in vacuo* and the resulting ionic liquid stirred with activated charcoal for 12 hours, after which the ionic liquid was passed through a short alumina column(s) (acidic and/or neutral) to give a colourless ionic liquid, which was dried at *ca*. 100 oC *in vacuo* for *ca.* 24 hours, when no visible signs of water (OH stretching bands) were present in the IR spectrum. Yields generally 70 to 80 %.

*[bmim][PF6]*

Salt: NaPF6

C8H15F6N2P requires: C, 33.81; H, 5.32; N, 9.86 %; Found: C, 34.13; H, 5.45; N, 9.55 %. 1H-NMR(270 MHz, Chloroform-*d*) : 8.68 (1H, s, NCHN), 7.25 (1H, m, CH3NCHCHN), 7.10 (1H, m, CH3NCHCHN), 4.16 (2H, t, J=7.4 Hz, NCH2(CH2)2CH3), 3.94 (3H, s, NCH3), 1.86 (2H, m, NCH2CH2CH2CH3), 1.36 (2H, m, N(CH2)2CH2CH3), 0.95 (3H, t, J=7.3 Hz, N(CH2)3CH3). (FAB +ve) m/z: 423 ({[bmim]2[PF6]}+), 139 ([bmim]+); (FAB -ve) m/z: 145 ([PF6]-).

*[bmim][BF4]*

Salt: NaBF4

1H-NMR(270 MHz, Chloroform-*d*) : 8.83 (1H, s, NCHN), 7.36 (1H, t, J=1.7 Hz, CH3NCHCHN), 7.31 (1H, t, J=1.7 Hz, CH3NCHCHN), 4.05 (2H, t, J=7.5 Hz, NCH2(CH2)2CH3), 3.81 (3H, s, NCH3), 1.67 (2H, m, NCH2CH2CH2CH3), 1.15 (2H, m, N(CH2)2CH2CH3), 0.73 (3H, t, J=7.3 Hz, N(CH2)3CH3).Mass Spectrum (FAB +ve) m/z: 365 ({[bmim]2[BF4]}+);139 ([bmim]+); (FAB –ve) m/z: 87 ([BF4]-).

*[bmim][(CF3SO2)2N]*

Salt: Li(CF3SO2)2N

C10H15F6N3O4S2 requires: C, 28.64; H, 3.61; N, 10.02 %; Found: C, 28.55; H, 3.68; N, 9.89 %. 1H-NMR(270 MHz, Chloroform-*d*) : 8.70 (1H, s, NCHN), 7.29 (2H, m, CH3NCHCHN), 4.14 (2H, t, J=7.4 Hz, NCH2(CH2)2CH3), 3.92 (3H, s, NCH3), 1.89 (2H, m, NCH2CH2CH2CH3), 1.34 (2H, m, N(CH2)2CH2CH3), 0.93 (3H, t, J=7.2 Hz, N(CH2)3CH3). Mass spectrum(FAB +ve) m/z:139 ([bmim]+).

*[bmim][CF3SO3]*

Salt: NaCF3SO3

C9H15F3N2O3S requires: C, 37.50; H, 5.24; N, 9.72 %; Found: C, 37.40; H, 5.28; N, 9.62 %. 1H-NMR(270 MHz, Chloroform-*d*) : 9.00 (1H, s, NCHN), 7.39 (1H, s, CH3NCHCHN), 7.37 (1H, s, CH3NCHCHN), 4.14 (2H, t, J=7.4 Hz, NCH2(CH2)2CH3), 3.09 (3H, s, NCH3), 1.80 (2H, m, NCH2CH2CH2CH3), 1.30 (2H, m, N(CH2)2CH2CH3), 0.87 (3H, t, J=7.3 Hz, N(CH2)3CH3). Mass spectrum(FAB +ve) m/z:139 ([bmim]+).

*[bmim][SbF6]*

Salt: NaSbF6

C8H15F3N2F6Sb requires: C, 25.63; H, 4.03; N, 7.47 %; Found: C, 25.78; H, 3.90; N, 7.43 %. 1H-NMR (270 MHz, DMSO-*d*6) : 9.07 (1H, s, NCHN), 7.73 (1H, m, CH3NCHCHN), 7.66 (1H, m, CH3NCHCHN), 4.15 (2H, t, J=7.2 Hz, NCH2(CH2)2CH3), 3.84 (3H, s, NCH3), 1.76 (2H, m, NCH2CH2CH2CH3), 1.25 (2H, m, N(CH2)2CH2CH3), 0.89 (3H, t, J=7.3 Hz, N(CH2)3CH3). Mass Spectrum (FAB +ve) m/z: 139 ([bmim]+), 513 ({[bmim]2[SbF6]}+); (FAB –ve) m/z: 235 [SbF6]-.

*[bm2im][BF4]*

Salt: NaBF4

C9H17F4N2B requires: C, 45.03; H, 7.14; N, 11.67 %; Found: C, 46.72; H, 6.77; N, 11.67 %. 1H-NMR (270 MHz, DMSO-*d*6) : 7.54 (2H, m, CH3NCHCHN), 4.10 (2H, m, NCH2(CH2)2CH3), 3.79 (3H, s, NCH3), 2.57 (3H, s, NC(CH3)N), 1.69 (2H, m, NCH2CH2CH2CH3), 1.27 (2H, m, N(CH2)2CH2CH3), 0.88 (3H, m, (N(CH2)3CH3,). Mass spectrum(FAB +ve) m/z:393 ({[bm2im]2[BF4]}+), 153 ([bm2im]+); (FAB -ve) m/z: 87 ([BF4]-), 19 (F-);

*[bm2im][(CF3SO2)2N]*

Salt: Li(CF3SO2)2N

C11H17F6N3O4S2 requires: C, 30.49; H, 3.95; N, 9.70 %; Found: C, 30.58; H, 4.09; N, 9.51 %. 1H-NMR (270 MHz, Chloroform-*d*) : 7.20 (1H, s, CH3NCHCHN), 7.18 (1H, s, CH3NCHCHN), 4.05 (2H, t, J=7.4 Hz, NCH2(CH2)2CH3), 3.79 (3H, s, NCH3), 2.60 (3H, s, NC(CH3)N), 1.78 (2H, m, NCH2CH2CH2CH3), 1.37 (2H, m, N(CH2)2CH2CH3), 1.03 (3H, t, J=7.4 Hz, (N(CH2)3CH3,). Mass spectrum(FAB +ve) m/z:586 ({[bm2im]2[N(Tf)2]}+), 153 ([bm2im]+); (FAB -ve) m/z:280 ([N(Tf)2]-).

**1-Butyl-1-methylpyrrolidinium bis-(trifluoromethylsulfonyl)imide,[bmpy][N(Tf)2].**

In a Schlenk flask, a solution of [bmpy][N(Tf)2] (35.8 g, 0.202 mol) in dichloromethane (50 cm3) was added to lithium bis-(trifluoromethylsulfonyl)imide (57.4 g, 0.200 mol). The resulting suspension was stirred for 72 hours, then filtered. The residual salt was washed with further aliquots of dichloromethane and the combined organic extracts were washed with water until the aqueous phase was halide free (by silver nitrate test), after which the solvent was removed *in vacuo*. The resulting liquid was treated with activated charcoal and filtered through a pad of acidic alumina to give a colourless liquid, which was dried at *ca*. 100 oC *in vacuo* until no visible signs of water (OH stretching bands) were present in the IR spectrum. (73 g, 0.17 mol, 86 %).

C11H20F6N3O4S2 requires: C, 31.28; H, 4.77; N, 6.63 %; Found: C, 31.53; H, 4.69; N, 6.57 %1H-NMR (270 MHz, Chloroform-*d*) H (ppm): 3.65-3.32 (m, 4H), 3.30-3.24 (m, 2H), 2.96 (s, 3H), 2.08 (br. s, 4H), 1.65 (quintet, 2H, *J* = 7.4 Hz), 1.30 (sextet, 2H, *J* = 7.4 Hz), 0.93 (3, t, 3H, *J* = 7.4 Hz). Mass spectrum(FAB +ve) m/z:564 ({[bmpy]2[N(Tf)2]}+), 142 ([bmpy]+); (FAB -ve) *m*/*z*: 702 ({[bmpy][N(Tf)2]2}-), 280 ([N(Tf)2]-).
